# Supplementary material for: 2017 update on the relationship between diabetes and colorectal cancer: epidemiology, potential molecular mechanisms and therapeutic implications
Source: PubMed Central journal article supplement (PMC5392343; doi:10.18632/oncotarget.14472), 2017-01-03
Supplement: oncotarget-08-18456-s001.pdf [file oncotarget-08-18456-s001.pdf]

## 2017 update on the relationship between diabetes and colorectal cancer: epidemiology, potential molecular mechanisms and therapeutic implications

### Supplementary Material

Supplementary Table 1: Agents to treat DM

|                                                          | Agent                                          | Route      | Molecular target                                                                                                                                                      | Impact on glucose homeostasis and insulin                                                                           | Impact on weight     | Impact on colorectal cancer   |
|----------------------------------------------------------|------------------------------------------------|------------|-----------------------------------------------------------------------------------------------------------------------------------------------------------------------|---------------------------------------------------------------------------------------------------------------------|----------------------|-------------------------------|
| Activate insulin receptor/<br>increase insulin secretion | Insulin                                        | Parenteral | Activates insulin receptor                                                                                                                                            | Increased insulin                                                                                                   | Increase             | Increase/neutral/<br>decrease |
|                                                          | Sulphonyl-ureas/ Meglitinides                  | Oral       | Inhibits sulfonylurea receptor (SUR1, a component of the ATP-dependent potassium channel)/ modulate ATP-dependent potassium channel activity in pancreatic beta cells | Increased insulin secretion                                                                                         | Increase             | Neutral                       |
|                                                          | GLP-1-based therapies: DPP-4 inhibitors        | Oral       | Inhibits DPP-4 and decreases degradation of incretins                                                                                                                 | Enhanced glucose-dependent insulin secretion, slowed gastric emptying reduced postprandial glucagon and food intake | Neutral              | Neutral                       |
|                                                          | GLP-1-based therapies: GLP-1 receptor agonists | Parenteral | Activates GLP-1 receptor                                                                                                                                              |                                                                                                                     | Neutral/<br>decrease | Neutral/decrease              |
|                                                          |                                                |            |                                                                                                                                                                       |                                                                                                                     |                      |                               |
|                                                          |                                                |            |                                                                                                                                                                       |                                                                                                                     |                      |                               |
| Sensitize to insulin action                              | Thiazolidinediones                             | Oral       | Activate peroxisome proliferator-activated receptor gamma (PPAR- $\gamma$ )                                                                                           | Sensitize to insulin action: increase glucose utilization and decrease glucose production                           | Neutral              | Neutral/decrease              |
| Decrease glucose absorption or synthesis                 | Metformin                                      | Oral       | Inhibits glycerophosphate dehydrogenase                                                                                                                               | Decrease glucose synthesis                                                                                          | Decrease             | Decrease                      |
|                                                          | $\alpha$ -glucosidase inhibitors               | Oral       | Inhibit intestinal $\alpha$ -glucosidase                                                                                                                              | Decrease glucose gut absorption                                                                                     | Decrease             | Neutral/decrease              |
|                                                          | SGLT2 inhibitors                               | Oral       | Inhibit sodium-linked glucose transporter 2                                                                                                                           | Increase glucose urinary losses                                                                                     | Decrease             | Neutral                       |

GLP-1: Glucagon-like peptide-1; DPP-4: dipeptidyl peptidase 4; SGLT2: sodium-linked glucose transporter  
GLP-1-based therapies mimic the effects of incretins. Incretins (GLP-1 and glucose-dependent insulinotropic polypeptide) are gut hormones released in response to food ingestion that stimulate insulin secretion and limit glucagon release.
